# Supplementary material
Source: publisher site journal article supplement (http://bdj.pensoft.net//lib/ajax_srv/article_elements_srv.php?action=download_suppl_file&instance_id=750267)
Supplement: Supplementary file [file article_elements_srv.php]

Jun 1, 2007 - Jun 1, 2014

 All Sessions  
100.00%

 + Add Segment

Explorer

Summary

| Language                   | Acquisition                                                            |                                                              |                                                                        | Behavior                                                     |                                                            |                                                                  | Conversions                                                |                                                      |                                                                |
|----------------------------|------------------------------------------------------------------------|--------------------------------------------------------------|------------------------------------------------------------------------|--------------------------------------------------------------|------------------------------------------------------------|------------------------------------------------------------------|------------------------------------------------------------|------------------------------------------------------|----------------------------------------------------------------|
|                            | Sessions                                                               | % New Sessions                                               | New Users                                                              | Bounce Rate                                                  | Pages / Session                                            | Avg. Session Duration                                            | Goal Conversion Rate                                       | Goal Completions                                     | Goal Value                                                     |
|                            | <b>7,549,849</b><br><small>% of Total: 100.00%<br/>(7,549,849)</small> | <b>29.24%</b><br><small>Site Avg: 29.19%<br/>(0.18%)</small> | <b>2,207,842</b><br><small>% of Total: 100.18%<br/>(2,203,942)</small> | <b>30.70%</b><br><small>Site Avg: 30.70%<br/>(0.00%)</small> | <b>12.64</b><br><small>Site Avg: 12.64<br/>(0.00%)</small> | <b>00:12:58</b><br><small>Site Avg: 00:12:58<br/>(0.00%)</small> | <b>0.00%</b><br><small>Site Avg: 0.00%<br/>(0.00%)</small> | <b>0</b><br><small>% of Total: 0.00%<br/>(0)</small> | <b>\$0.00</b><br><small>% of Total: 0.00%<br/>(\$0.00)</small> |
| 1. <a href="#">en-us</a>   | <b>2,676,116</b> (35.45%)                                              | 31.95%                                                       | 854,906 (38.72%)                                                       | 34.42%                                                       | 12.51                                                      | 00:12:05                                                         | 0.00%                                                      | 0 (0.00%)                                            | \$0.00 (0.00%)                                                 |
| 2. <a href="#">es</a>      | <b>1,358,102</b> (17.99%)                                              | 25.85%                                                       | 351,061 (15.90%)                                                       | 24.63%                                                       | 15.15                                                      | 00:15:29                                                         | 0.00%                                                      | 0 (0.00%)                                            | \$0.00 (0.00%)                                                 |
| 3. <a href="#">pt-br</a>   | <b>951,149</b> (12.60%)                                                | 26.58%                                                       | 252,854 (11.45%)                                                       | 23.39%                                                       | 11.58                                                      | 00:12:52                                                         | 0.00%                                                      | 0 (0.00%)                                            | \$0.00 (0.00%)                                                 |
| 4. <a href="#">es-es</a>   | <b>572,127</b> (7.58%)                                                 | 24.70%                                                       | 141,318 (6.40%)                                                        | 34.91%                                                       | 13.65                                                      | 00:13:37                                                         | 0.00%                                                      | 0 (0.00%)                                            | \$0.00 (0.00%)                                                 |
| 5. <a href="#">fr</a>      | <b>406,307</b> (5.38%)                                                 | 25.75%                                                       | 104,607 (4.74%)                                                        | 24.83%                                                       | 14.31                                                      | 00:17:05                                                         | 0.00%                                                      | 0 (0.00%)                                            | \$0.00 (0.00%)                                                 |
| 6. <a href="#">de</a>      | <b>185,327</b> (2.45%)                                                 | 32.09%                                                       | 59,479 (2.69%)                                                         | 32.11%                                                       | 10.08                                                      | 00:11:48                                                         | 0.00%                                                      | 0 (0.00%)                                            | \$0.00 (0.00%)                                                 |
| 7. <a href="#">en-gb</a>   | <b>146,759</b> (1.94%)                                                 | 29.34%                                                       | 43,058 (1.95%)                                                         | 34.11%                                                       | 9.90                                                       | 00:10:36                                                         | 0.00%                                                      | 0 (0.00%)                                            | \$0.00 (0.00%)                                                 |
| 8. <a href="#">zh-cn</a>   | <b>143,763</b> (1.90%)                                                 | 22.98%                                                       | 33,033 (1.50%)                                                         | 21.87%                                                       | 12.67                                                      | 00:14:36                                                         | 0.00%                                                      | 0 (0.00%)                                            | \$0.00 (0.00%)                                                 |
| 9. <a href="#">de-de</a>   | <b>115,500</b> (1.53%)                                                 | 36.09%                                                       | 41,682 (1.89%)                                                         | 36.87%                                                       | 9.18                                                       | 00:10:20                                                         | 0.00%                                                      | 0 (0.00%)                                            | \$0.00 (0.00%)                                                 |
| 10. <a href="#">es-419</a> | <b>90,453</b> (1.20%)                                                  | 26.97%                                                       | 24,397 (1.11%)                                                         | 25.36%                                                       | 14.57                                                      | 00:14:39                                                         | 0.00%                                                      | 0 (0.00%)                                            | \$0.00 (0.00%)                                                 |
| 11. <a href="#">ru</a>     | <b>77,856</b> (1.03%)                                                  | 35.34%                                                       | 27,516 (1.25%)                                                         | 43.24%                                                       | 7.45                                                       | 00:08:32                                                         | 0.00%                                                      | 0 (0.00%)                                            | \$0.00 (0.00%)                                                 |
| 12. <a href="#">en</a>     | <b>75,305</b> (1.00%)                                                  | 36.35%                                                       | 27,371 (1.24%)                                                         | 46.54%                                                       | 8.21                                                       | 00:09:07                                                         | 0.00%                                                      | 0 (0.00%)                                            | \$0.00 (0.00%)                                                 |
| 13. <a href="#">zh-tw</a>  | <b>67,031</b> (0.89%)                                                  | 21.98%                                                       | 14,733 (0.67%)                                                         | 32.07%                                                       | 8.11                                                       | 00:10:56                                                         | 0.00%                                                      | 0 (0.00%)                                            | \$0.00 (0.00%)                                                 |
| 14. <a href="#">it</a>     | <b>55,897</b> (0.74%)                                                  | 36.84%                                                       | 20,591 (0.93%)                                                         | 32.96%                                                       | 12.27                                                      | 00:11:00                                                         | 0.00%                                                      | 0 (0.00%)                                            | \$0.00 (0.00%)                                                 |
| 15. <a href="#">es-mx</a>  | <b>54,383</b> (0.72%)                                                  | 26.53%                                                       | 14,430 (0.65%)                                                         | 19.03%                                                       | 17.51                                                      | 00:16:58                                                         | 0.00%                                                      | 0 (0.00%)                                            | \$0.00 (0.00%)                                                 |
| 16. <a href="#">ja</a>     | <b>48,617</b> (0.64%)                                                  | 31.52%                                                       | 15,326 (0.69%)                                                         | 29.32%                                                       | 11.57                                                      | 00:08:41                                                         | 0.00%                                                      | 0 (0.00%)                                            | \$0.00 (0.00%)                                                 |
| 17. <a href="#">ko</a>     | <b>46,808</b> (0.62%)                                                  | 23.71%                                                       | 11,098 (0.50%)                                                         | 22.98%                                                       | 12.17                                                      | 00:13:44                                                         | 0.00%                                                      | 0 (0.00%)                                            | \$0.00 (0.00%)                                                 |
| 18. <a href="#">pl</a>     | <b>45,725</b> (0.61%)                                                  | 31.41%                                                       | 14,362 (0.65%)                                                         | 40.20%                                                       | 10.54                                                      | 00:09:51                                                         | 0.00%                                                      | 0 (0.00%)                                            | \$0.00 (0.00%)                                                 |
| 19. <a href="#">es-ar</a>  | <b>44,511</b> (0.59%)                                                  | 26.26%                                                       | 11,689 (0.53%)                                                         | 21.55%                                                       | 14.85                                                      | 00:15:34                                                         | 0.00%                                                      | 0 (0.00%)                                            | \$0.00 (0.00%)                                                 |
| 20. <a href="#">nl</a>     | <b>44,299</b> (0.59%)                                                  | 38.32%                                                       | 16,974 (0.77%)                                                         | 39.96%                                                       | 10.06                                                      | 00:08:33                                                         | 0.00%                                                      | 0 (0.00%)                                            | \$0.00 (0.00%)                                                 |
| 21. <a href="#">fr-fr</a>  | <b>38,794</b> (0.51%)                                                  | 24.49%                                                       | 9,500 (0.43%)                                                          | 47.23%                                                       | 9.05                                                       | 00:07:43                                                         | 0.00%                                                      | 0 (0.00%)                                            | \$0.00 (0.00%)                                                 |
| 22. <a href="#">cs</a>     | <b>30,899</b> (0.41%)                                                  | 34.23%                                                       | 10,578 (0.48%)                                                         | 40.00%                                                       | 10.46                                                      | 00:09:07                                                         | 0.00%                                                      | 0 (0.00%)                                            | \$0.00 (0.00%)                                                 |
| 23. <a href="#">it-it</a>  | <b>19,614</b> (0.26%)                                                  | 40.79%                                                       | 8,000 (0.36%)                                                          | 43.66%                                                       | 7.59                                                       | 00:07:14                                                         | 0.00%                                                      | 0 (0.00%)                                            | \$0.00 (0.00%)                                                 |
| 24. <a href="#">sv-se</a>  | <b>19,222</b> (0.25%)                                                  | 16.59%                                                       | 3,189 (0.14%)                                                          | 27.93%                                                       | 8.40                                                       | 00:10:42                                                         | 0.00%                                                      | 0 (0.00%)                                            | \$0.00 (0.00%)                                                 |
| 25. <a href="#">pt-pt</a>  | <b>17,567</b> (0.23%)                                                  | 35.95%                                                       | 6,315 (0.29%)                                                          | 34.37%                                                       | 9.09                                                       | 00:09:12                                                         | 0.00%                                                      | 0 (0.00%)                                            | \$0.00 (0.00%)                                                 |
| 26. <a href="#">ru-ru</a>  | <b>17,534</b> (0.23%)                                                  | 28.54%                                                       | 5,005 (0.23%)                                                          | 40.55%                                                       | 7.65                                                       | 00:08:04                                                         | 0.00%                                                      | 0 (0.00%)                                            | \$0.00 (0.00%)                                                 |

| Rank | Language Pair | Users          | Market Share | Downloads     | Engagement | Retention | Session Length | Churn Rate | Revenue        |
|------|---------------|----------------|--------------|---------------|------------|-----------|----------------|------------|----------------|
| 27.  | sv            | 15,208 (0.20%) | 28.25%       | 4,296 (0.19%) | 30.44%     | 9.55      | 00:11:19       | 0.00%      | \$0.00 (0.00%) |
| 28.  | tr            | 13,630 (0.18%) | 52.83%       | 7,201 (0.33%) | 42.65%     | 8.91      | 00:06:35       | 0.00%      | \$0.00 (0.00%) |
| 29.  | ja-jp         | 13,236 (0.18%) | 27.45%       | 3,633 (0.16%) | 39.77%     | 7.52      | 00:06:39       | 0.00%      | \$0.00 (0.00%) |
| 30.  | pt            | 8,970 (0.12%)  | 45.31%       | 4,064 (0.18%) | 33.57%     | 11.34     | 00:10:35       | 0.00%      | \$0.00 (0.00%) |
| 31.  | sk            | 8,524 (0.11%)  | 29.22%       | 2,491 (0.11%) | 43.02%     | 8.33      | 00:08:29       | 0.00%      | \$0.00 (0.00%) |
| 32.  | ca            | 7,849 (0.10%)  | 34.37%       | 2,698 (0.12%) | 25.39%     | 11.04     | 00:15:17       | 0.00%      | \$0.00 (0.00%) |
| 33.  | da            | 7,532 (0.10%)  | 44.54%       | 3,355 (0.15%) | 39.66%     | 7.15      | 00:06:15       | 0.00%      | \$0.00 (0.00%) |
| 34.  | ko-kr         | 7,336 (0.10%)  | 21.76%       | 1,596 (0.07%) | 26.80%     | 13.57     | 00:14:23       | 0.00%      | \$0.00 (0.00%) |
| 35.  | th            | 6,792 (0.09%)  | 47.44%       | 3,222 (0.15%) | 47.47%     | 5.65      | 00:06:29       | 0.00%      | \$0.00 (0.00%) |
| 36.  | id            | 6,389 (0.08%)  | 56.58%       | 3,615 (0.16%) | 51.56%     | 5.79      | 00:08:21       | 0.00%      | \$0.00 (0.00%) |
| 37.  | vi            | 6,203 (0.08%)  | 48.67%       | 3,019 (0.14%) | 42.14%     | 6.88      | 00:07:52       | 0.00%      | \$0.00 (0.00%) |
| 38.  | hu            | 5,588 (0.07%)  | 65.37%       | 3,653 (0.17%) | 60.79%     | 3.87      | 00:02:36       | 0.00%      | \$0.00 (0.00%) |
| 39.  | nl-nl         | 5,103 (0.07%)  | 50.44%       | 2,574 (0.12%) | 58.16%     | 4.87      | 00:03:10       | 0.00%      | \$0.00 (0.00%) |
| 40.  | es-la         | 4,811 (0.06%)  | 21.10%       | 1,015 (0.05%) | 41.88%     | 11.48     | 00:11:36       | 0.00%      | \$0.00 (0.00%) |
| 41.  | el            | 4,350 (0.06%)  | 58.83%       | 2,559 (0.12%) | 53.47%     | 4.46      | 00:03:02       | 0.00%      | \$0.00 (0.00%) |
| 42.  | es-cl         | 3,717 (0.05%)  | 38.04%       | 1,414 (0.06%) | 28.36%     | 9.32      | 00:10:23       | 0.00%      | \$0.00 (0.00%) |
| 43.  | es-xl         | 3,447 (0.05%)  | 5.66%        | 195 (0.01%)   | 55.61%     | 8.28      | 00:08:22       | 0.00%      | \$0.00 (0.00%) |
| 44.  | fi            | 3,286 (0.04%)  | 48.60%       | 1,597 (0.07%) | 40.38%     | 9.25      | 00:05:42       | 0.00%      | \$0.00 (0.00%) |
| 45.  | nb-no         | 2,923 (0.04%)  | 26.99%       | 789 (0.04%)   | 45.77%     | 12.28     | 00:08:11       | 0.00%      | \$0.00 (0.00%) |
| 46.  | tr-tr         | 2,884 (0.04%)  | 44.17%       | 1,274 (0.06%) | 48.37%     | 7.97      | 00:06:02       | 0.00%      | \$0.00 (0.00%) |
| 47.  | th-th         | 2,844 (0.04%)  | 36.71%       | 1,044 (0.05%) | 44.83%     | 5.42      | 00:06:15       | 0.00%      | \$0.00 (0.00%) |
| 48.  | hu-hu         | 2,816 (0.04%)  | 63.99%       | 1,802 (0.08%) | 63.85%     | 3.09      | 00:01:58       | 0.00%      | \$0.00 (0.00%) |
| 49.  | fr-ca         | 2,746 (0.04%)  | 4.04%        | 111 (0.01%)   | 9.65%      | 71.40     | 00:59:13       | 0.00%      | \$0.00 (0.00%) |
| 50.  | ja-jp-mac     | 2,671 (0.04%)  | 19.43%       | 519 (0.02%)   | 16.02%     | 29.11     | 00:16:30       | 0.00%      | \$0.00 (0.00%) |
| 51.  | ar            | 2,407 (0.03%)  | 59.41%       | 1,430 (0.06%) | 57.96%     | 3.48      | 00:03:30       | 0.00%      | \$0.00 (0.00%) |
| 52.  | it            | 2,331 (0.03%)  | 41.57%       | 969 (0.04%)   | 43.07%     | 9.90      | 00:10:22       | 0.00%      | \$0.00 (0.00%) |
| 53.  | fi-fi         | 2,318 (0.03%)  | 40.08%       | 929 (0.04%)   | 43.70%     | 6.98      | 00:07:07       | 0.00%      | \$0.00 (0.00%) |
| 54.  | zh-hk         | 2,300 (0.03%)  | 35.17%       | 809 (0.04%)   | 35.22%     | 7.16      | 00:05:24       | 0.00%      | \$0.00 (0.00%) |
| 55.  | no            | 2,247 (0.03%)  | 40.10%       | 901 (0.04%)   | 36.98%     | 10.29     | 00:07:33       | 0.00%      | \$0.00 (0.00%) |
| 56.  | et            | 2,239 (0.03%)  | 41.80%       | 936 (0.04%)   | 38.28%     | 5.85      | 00:06:03       | 0.00%      | \$0.00 (0.00%) |
| 57.  | en-au         | 2,184 (0.03%)  | 25.18%       | 550 (0.02%)   | 30.13%     | 6.77      | 00:08:19       | 0.00%      | \$0.00 (0.00%) |
| 58.  | bg            | 2,137 (0.03%)  | 65.70%       | 1,404 (0.06%) | 66.31%     | 3.68      | 00:02:22       | 0.00%      | \$0.00 (0.00%) |
| 59.  | cs-cz         | 2,097 (0.03%)  | 32.09%       | 673 (0.03%)   | 33.33%     | 12.36     | 00:12:18       | 0.00%      | \$0.00 (0.00%) |
| 60.  | es-us         | 1,828 (0.02%)  | 50.16%       | 917 (0.04%)   | 46.61%     | 5.71      | 00:06:23       | 0.00%      | \$0.00 (0.00%) |
| 61.  | el-gr         | 1,725 (0.02%)  | 65.33%       | 1,127 (0.05%) | 59.94%     | 4.77      | 00:03:22       | 0.00%      | \$0.00 (0.00%) |
| 62.  | ro            | 1,691 (0.02%)  | 64.34%       | 1,088 (0.05%) | 58.55%     | 5.78      | 00:04:12       | 0.00%      | \$0.00 (0.00%) |
| 63.  | he            | 1,643 (0.02%)  | 67.32%       | 1,106 (0.05%) | 57.21%     | 4.26      | 00:02:38       | 0.00%      | \$0.00 (0.00%) |
| 64.  | fil           | 1,605 (0.02%)  | 70.03%       | 1,124 (0.05%) | 61.74%     | 2.61      | 00:02:48       | 0.00%      | \$0.00 (0.00%) |
| 65.  | de-at         | 1,559 (0.02%)  | 49.90%       | 778 (0.04%)   | 14.75%     | 10.25     | 00:14:58       | 0.00%      | \$0.00 (0.00%) |
| 66.  | vi-vn         | 1,375 (0.02%)  | 53.24%       | 732 (0.03%)   | 51.27%     | 5.26      | 00:04:56       | 0.00%      | \$0.00 (0.00%) |

|      |                                   |                      |        |             |        |       |          |       |           |                |
|------|-----------------------------------|----------------------|--------|-------------|--------|-------|----------|-------|-----------|----------------|
| 67.  | <a href="#">sl</a>                | <b>1,343</b> (0.02%) | 62.92% | 845 (0.04%) | 63.89% | 3.09  | 00:01:47 | 0.00% | 0 (0.00%) | \$0.00 (0.00%) |
| 68.  | <a href="#">da-dk</a>             | <b>1,233</b> (0.02%) | 54.58% | 673 (0.03%) | 64.96% | 3.64  | 00:02:34 | 0.00% | 0 (0.00%) | \$0.00 (0.00%) |
| 69.  | <a href="#">uk</a>                | <b>1,168</b> (0.02%) | 58.65% | 685 (0.03%) | 52.31% | 5.44  | 00:04:39 | 0.00% | 0 (0.00%) | \$0.00 (0.00%) |
| 70.  | <a href="#">lv</a>                | <b>976</b> (0.01%)   | 51.43% | 502 (0.02%) | 50.72% | 10.35 | 00:06:58 | 0.00% | 0 (0.00%) | \$0.00 (0.00%) |
| 71.  | <a href="#">hr</a>                | <b>900</b> (0.01%)   | 72.11% | 649 (0.03%) | 62.67% | 4.63  | 00:03:05 | 0.00% | 0 (0.00%) | \$0.00 (0.00%) |
| 72.  | <a href="#">pl-pl</a>             | <b>822</b> (0.01%)   | 64.48% | 530 (0.02%) | 63.87% | 6.42  | 00:02:36 | 0.00% | 0 (0.00%) | \$0.00 (0.00%) |
| 73.  | <a href="#">ro-ro</a>             | <b>798</b> (0.01%)   | 43.98% | 351 (0.02%) | 50.88% | 8.39  | 00:07:49 | 0.00% | 0 (0.00%) | \$0.00 (0.00%) |
| 74.  | <a href="#">hr-hr</a>             | <b>753</b> (0.01%)   | 78.35% | 590 (0.03%) | 41.43% | 4.33  | 00:02:47 | 0.00% | 0 (0.00%) | \$0.00 (0.00%) |
| 75.  | <a href="#">ar-sa</a>             | <b>730</b> (0.01%)   | 79.18% | 578 (0.03%) | 64.25% | 3.08  | 00:02:13 | 0.00% | 0 (0.00%) | \$0.00 (0.00%) |
| 76.  | <a href="#">sr</a>                | <b>687</b> (0.01%)   | 77.15% | 530 (0.02%) | 67.54% | 2.49  | 00:01:30 | 0.00% | 0 (0.00%) | \$0.00 (0.00%) |
| 77.  | <a href="#">nb</a>                | <b>659</b> (0.01%)   | 55.24% | 364 (0.02%) | 54.93% | 9.95  | 00:04:49 | 0.00% | 0 (0.00%) | \$0.00 (0.00%) |
| 78.  | <a href="#">es-co</a>             | <b>624</b> (0.01%)   | 22.76% | 142 (0.01%) | 57.85% | 7.83  | 00:07:31 | 0.00% | 0 (0.00%) | \$0.00 (0.00%) |
| 79.  | <a href="#">ca-es</a>             | <b>597</b> (0.01%)   | 39.20% | 234 (0.01%) | 33.84% | 8.04  | 00:11:34 | 0.00% | 0 (0.00%) | \$0.00 (0.00%) |
| 80.  | <a href="#">(not set)</a>         | <b>534</b> (0.01%)   | 72.85% | 389 (0.02%) | 40.82% | 5.73  | 00:05:48 | 0.00% | 0 (0.00%) | \$0.00 (0.00%) |
| 81.  | <a href="#">es-pe</a>             | <b>516</b> (0.01%)   | 20.16% | 104 (0.00%) | 14.34% | 14.25 | 00:13:51 | 0.00% | 0 (0.00%) | \$0.00 (0.00%) |
| 82.  | <a href="#">c</a>                 | <b>494</b> (0.01%)   | 97.77% | 483 (0.02%) | 96.56% | 1.10  | 00:00:05 | 0.00% | 0 (0.00%) | \$0.00 (0.00%) |
| 83.  | <a href="#">en-za</a>             | <b>449</b> (0.01%)   | 70.16% | 315 (0.01%) | 63.25% | 3.34  | 00:02:58 | 0.00% | 0 (0.00%) | \$0.00 (0.00%) |
| 84.  | <a href="#">en-ca</a>             | <b>384</b> (0.01%)   | 65.10% | 250 (0.01%) | 50.00% | 4.53  | 00:06:57 | 0.00% | 0 (0.00%) | \$0.00 (0.00%) |
| 85.  | <a href="#">es-pa</a>             | <b>361</b> (0.00%)   | 27.70% | 100 (0.00%) | 24.10% | 8.70  | 00:08:32 | 0.00% | 0 (0.00%) | \$0.00 (0.00%) |
| 86.  | <a href="#">en_gb</a>             | <b>318</b> (0.00%)   | 84.59% | 269 (0.01%) | 71.70% | 2.19  | 00:01:56 | 0.00% | 0 (0.00%) | \$0.00 (0.00%) |
| 87.  | <a href="#">en_us</a>             | <b>289</b> (0.00%)   | 85.81% | 248 (0.01%) | 66.78% | 2.16  | 00:01:39 | 0.00% | 0 (0.00%) | \$0.00 (0.00%) |
| 88.  | <a href="#">en-in</a>             | <b>257</b> (0.00%)   | 90.66% | 233 (0.01%) | 70.04% | 1.82  | 00:01:28 | 0.00% | 0 (0.00%) | \$0.00 (0.00%) |
| 89.  | <a href="#">ru; alexa toolbar</a> | <b>236</b> (0.00%)   | 0.42%  | 1 (0.00%)   | 67.37% | 6.61  | 00:14:21 | 0.00% | 0 (0.00%) | \$0.00 (0.00%) |
| 90.  | <a href="#">he-il</a>             | <b>220</b> (0.00%)   | 54.55% | 120 (0.01%) | 59.09% | 4.65  | 00:03:14 | 0.00% | 0 (0.00%) | \$0.00 (0.00%) |
| 91.  | <a href="#">es-bo</a>             | <b>201</b> (0.00%)   | 13.93% | 28 (0.00%)  | 13.43% | 51.72 | 00:29:32 | 0.00% | 0 (0.00%) | \$0.00 (0.00%) |
| 92.  | <a href="#">id-id</a>             | <b>189</b> (0.00%)   | 68.78% | 130 (0.01%) | 59.26% | 3.92  | 00:04:26 | 0.00% | 0 (0.00%) | \$0.00 (0.00%) |
| 93.  | <a href="#">de-ch</a>             | <b>187</b> (0.00%)   | 63.64% | 119 (0.01%) | 57.22% | 7.89  | 00:02:47 | 0.00% | 0 (0.00%) | \$0.00 (0.00%) |
| 94.  | <a href="#">es-ve</a>             | <b>182</b> (0.00%)   | 46.15% | 84 (0.00%)  | 30.22% | 11.41 | 00:14:48 | 0.00% | 0 (0.00%) | \$0.00 (0.00%) |
| 95.  | <a href="#">fa</a>                | <b>177</b> (0.00%)   | 51.41% | 91 (0.00%)  | 57.63% | 3.53  | 00:05:25 | 0.00% | 0 (0.00%) | \$0.00 (0.00%) |
| 96.  | <a href="#">es-ni</a>             | <b>161</b> (0.00%)   | 9.32%  | 15 (0.00%)  | 21.12% | 16.17 | 00:14:52 | 0.00% | 0 (0.00%) | \$0.00 (0.00%) |
| 97.  | <a href="#">fr-ch</a>             | <b>156</b> (0.00%)   | 39.74% | 62 (0.00%)  | 35.26% | 6.01  | 00:05:09 | 0.00% | 0 (0.00%) | \$0.00 (0.00%) |
| 98.  | <a href="#">es-uy</a>             | <b>141</b> (0.00%)   | 63.83% | 90 (0.00%)  | 16.31% | 14.91 | 00:10:00 | 0.00% | 0 (0.00%) | \$0.00 (0.00%) |
| 99.  | <a href="#">es-cr</a>             | <b>137</b> (0.00%)   | 42.34% | 58 (0.00%)  | 25.55% | 9.91  | 00:10:44 | 0.00% | 0 (0.00%) | \$0.00 (0.00%) |
| 100. | <a href="#">fa-ir</a>             | <b>137</b> (0.00%)   | 55.47% | 76 (0.00%)  | 54.74% | 4.70  | 00:04:53 | 0.00% | 0 (0.00%) | \$0.00 (0.00%) |
